# Supplementary material for: Proteomics Analysis of Cellular Proteins Co-Immunoprecipitated with Nucleoprotein of Influenza A Virus (H7N9)
Source: MDPI journal article supplement (doi:10.3390/ijms161125934), 2015-10-30
Supplement: s1 [file s1]

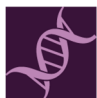

## Supplementary Information

primers: TAATACGACTCACTATAGGG (forward),

TAGAAGGCACAGTCGAGG (reverse).

```
ATGGCCTCTCAAGGCACTAAACGGTCTTATGAACAGATGGAACTGGTGGAGAACGCCAGAATGCCACT
GAAATCAGAGCATCCGTCGGAAGAATGGTTAGTGGAAATTGGACGATTCTACATCCAAATGTGCACCGAAC
TCAAACCTCAGTGATAATGAGGGACGGTTGATCCAAAACAGCATAACAATAGAGAGAATGGTGCTCTCTG
CTTTTGACGAAAGGAGAAATAGATACCTTGAAGAACATCCCAGTGCGGGGAAAGATCCTAAGAAAACCTG
GAGGACCTATATACAGGAGACGAGACGGAAAGTGGGTGAGAGAACTCATCCTTTATGACAAAGAAGAAA
TAAGGCGAATCTGGCGCCAAGCTAATAATGGTGAAGATGCAACGGCTGGTCTGACTCACCTGATGATCTG
GCATTCCAATTTGAATGATGCAACTTATCAGAGGACAAGAGCTCTTGTTTCGCACCGGAATGGATCCCAGG
ATGTGCTCTCTGATGCAAGGTTCAACTCTCCCTAGGAGGTCTGGAGCCGCAGGTGCTGCAGTCAAAGGA
ATTGGAACAATGGTGATGGAATTGATCAGAATGATCAAACGTGGGATCAATGATCGGAACCTTCTGGAGGG
GTGAGAATGGACGAAGAACAAGGATTGCTTATGAGAGAATGTGCAACATTCTCAAAGGAAAATTTCAA
CAGCTGCACAAAGAGCAATGGTGGATCAAGTGAGAGAAAGCCGGAACCCAGGAAATGCTGAGATCGAA
GATCTCATCTTTCTGGCACGGTCTGCACTCATATTGAGAGGGTCAGTTGCTCACAAATCTTGTCTGCCTGC
CTGTGTGTATGGACTTGCCGTAGCCAGTGGGTACGACTTTGAAAGGGAGGGATACTCTCTAGTCGGAATA
GACCCTTTCAGACTGCTTCAAACAGCCAAGTGTTCAGCCTAATCAGACCAAATGAGAATCCAGCACAC
AAGAGTCAACTGGTGTGGATGGCATGCCATTCTGCCGCATTGGAAGATCTAAGAGTATCAAGCTTCATCA
GAGGGACGAGGATGGTCCCAAGAGGGCAGCTTTCCACTAGAGGAGTTCAAATTGCTTCCAATGAAAATA
TCGAGGCTATGGAGTCAAATACACTTGAAGTGAAGCAGGTACTGGGCCATAAGGACCAGAAGTGGAG
GAAACACCAATCAACAGAGGGCATCTGCGGGCCAAATCAGCATAACCTACGTTCTCAGTACAGAGAA
ATCTCCCTTTGAGAGAGCAACCATTATGGCAGCATTCACTGGGAATACAGAGGGGAGAACATCTGACAT
GAGGACCGAAATCATAAGGATGATGGAAAGTGCAAGACCAGAAGATGTGTCTTTCCAGGGGCGGGGAG
TCTTCGAGCTCTCGGACGAAAAGGCAACGAACCCGATCGTGCCTTCCTTTGACATGAATAATGAAGGATC
TTATTTCTTCGGAGACAATGCCGAAGAGTACGATAACTAA
```

**Figure S1.** Sequencing result of pCMV-NP plasmid used in this study.

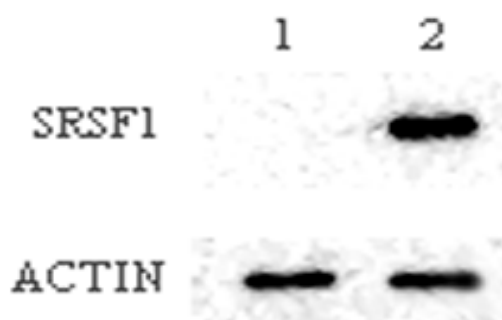

**Figure S2.** Western blot analysis of SRSF1 that was immunoprecipitated with NP.  $\beta$ -actin was used as a loading control. 1: empty pCMV; 2: pCMV-NP.
